# Supplementary material for: Effect of Phase Shift from Corals to Zoantharia on Reef Fish Assemblages
Source: PLoS One. 2015 Jan 28;10(1):e0116944. doi: 10.1371/journal.pone.0116944 (PMC4309678; doi:10.1371/journal.pone.0116944)
Supplement: S1 Table — (XLSX) [file pone.0116944.s001.xlsx]

## Sheet: Plan1
	Reef Condition
Species	Normal	Normal	Normal	Normal	Phase Shift	Phase Shit	Phase Shit	Phase Shit
Haemulon aurolineatum	23	76	9	52	407	135	210	147
Coryphopterus glaucofraenum	312	47	122	118	42	90	70	177
Serranus flaviventris	76	23	207	60	89	120	51	125
Haemulon steindachneri	16	3	76	21	64	65	40	132
Stegastes fuscus	16	34	4	29	9	51	26	6
Odontoscion dentex	6	33	18	94	6	3	11	0
Anisotremus virginicus	31	19	6	16	8	5	23	14
Sparisoma axillare	22	12	8	12	20	22	6	2
Pseudupeneus maculatus	10	6	5	2	20	0	7	7
Acanthurus chirurgus	15	0	3	4	7	3	11	12
Elacatinus figaro	14	10	6	2	1	6	8	8
Acanthurus bahianus	9	2	5	12	17	0	1	7
Stegastes variabilis	2	9	1	6	7	16	4	8
Pomacanthus arcuatus	12	11	3	10	3	7	4	2
Chaetodon striatus	1	3	1	5	11	8	5	5
Abudefduf saxatilis	0	5	0	14	0	2	10	0
Acanthurus coeruleus	0	0	1	6	2	11	2	1
Haemulon parra	15	0	0	5	0	0	0	0
Parablennius marmoreus	2	4	3	4	0	5	1	1
Scarus trispinosus	13	0	0	2	0	1	0	0
Holocentrus adscensionis	3	1	1	4	3	0	0	0
Chaetodipterus faber	0	6	0	0	0	0	3	2
Canthigaster figueiredoi	0	4	0	4	0	1	1	0
Sparisoma radians	1	3	1	2	0	0	3	0
Diplectrum radiale	0	4	0	1	1	0	0	2
Sphoeroides spengleri	0	1	1	4	1	0	0	1
Caranx bartholomaei	0	0	0	0	5	0	0	2
Ocyurus chrysurus	0	0	0	2	1	1	1	2
Pomacanthus paru	4	0	1	2	0	0	0	0
Sparisoma frondosum	0	0	0	0	3	0	3	1
Heteropriacanthus cruentatus	0	1	0	1	1	2	0	1
Lutjanus synagris	0	1	0	0	0	0	1	4
Holocanthus ciliaris	0	0	0	2	1	1	0	1
Lutjanus jocu	2	0	0	1	0	1	0	0
Cantherhines pullus	0	2	0	1	0	0	0	0
Ophioblennius trinitatis	0	0	1	0	0	1	1	0
Acanthostracion quadricornis	0	0	0	2	0	0	0	0
Gymnothorax vicinus	0	0	0	1	0	0	1	0
Ogcocephalus vespertilio	0	0	0	2	0	0	0	0
Sparisoma amplum	0	0	0	0	0	2	0	0
Aluterus scriptus	0	0	0	0	1	0	0	0
Bothus ocellatus	0	0	1	0	0	0	0	0
Calamus pennatula	0	0	0	0	0	1	0	0
Epinephelus adscencionis	0	1	0	0	0	0	0	0
Eucinostomus gula	0	0	1	0	0	0	0	0
Lutjanus analis	0	1	0	0	0	0	0	0
Myripristis jacobus	0	1	0	0	0	0	0	0
Scorpaena plumieri	0	0	0	1	0	0	0	0
Synodus spp	0	1	0	0	0	0	0	0
Thalassoma noronhanum	0	0	0	0	1	0	0	0
